# Supplementary material for: The complete chloroplast genome sequence of Gynostemma yixingense and comparative analysis with congeneric species
Source: PubMed Central journal article supplement (PMC7521087; doi:10.1590/1678-4685-gmb-2020-0092), 2020-09-25
Supplement: 1415-4757-GMB-43-4-e20200092-suppl1.pdf [file 1415-4757-GMB-43-4-e20200092-suppl1.pdf]

**Supplementary Material to “The complete chloroplast genome sequence of *Gynostemma yixingense* and comparative analysis with congeneric species”.**

**Table S1** - Information of gene introns in the chloroplast genome of *Gynostemma yixingense*.

| Genes           | Location | Length/bp |          |         |           |          |
|-----------------|----------|-----------|----------|---------|-----------|----------|
|                 |          | Exon I    | Intron I | Exon II | Intron II | Exon III |
| <i>atpF</i>     | LSC      | 411       | 688      | 144     |           |          |
| <i>ndhB</i>     | IR       | 756       | 686      | 777     |           |          |
| <i>ndhA</i>     | SSC      | 541       | 1176     | 551     |           |          |
| <i>rpl2</i>     | IR       | 435       | 682      | 393     |           |          |
| <i>rpoC1</i>    | LSC      | 1611      | 725      | 432     |           |          |
| <i>rps12</i> *  | LSC-IR   | 114       | —        | 231     | 540       | 27       |
| <i>rps16</i>    | LSC      | 209       | 850      | 44      |           |          |
| <i>trnV-UAC</i> | LSC      | 37        | 601      | 39      |           |          |
| <i>trnG-UCC</i> | LSC      | 20        | 659      | 51      |           |          |
| <i>trnI-GAU</i> | IR       | 42        | 952      | 35      |           |          |
| <i>trnA-UGC</i> | IR       | 37        | 802      | 36      |           |          |
| <i>trnK-UUU</i> | LSC      | 37        | 2489     | 35      |           |          |
| <i>trnL-UAA</i> | LSC      | 38        | 535      | 48      |           |          |
| <i>ycf3</i>     | LSC      | 155       | 746      | 226     | 716       | 126      |
| <i>clpP</i>     | LSC      | 228       | 622      | 291     | 835       | 69       |

\* trans-spliced gene.
