# Supplementary material for: The complete chloroplast genome sequence of Gynostemma yixingense and comparative analysis with congeneric species
Source: PubMed Central journal article supplement (PMC7521087; doi:10.1590/1678-4685-gmb-2020-0092), 2020-09-25
Supplement: 1415-4757-GMB-43-4-e20200092-suppl2.pdf [file 1415-4757-GMB-43-4-e20200092-suppl2.pdf]

**Supplementary Material to “The complete chloroplast genome sequence of *Gynostemma yixingense* and comparative analysis with congeneric species”.**

**Table S2** - Types and numbers of SSR identified in the chloroplast genome of *Gynostemma yixingense*.

| Repeat motif    | Type of repeats | Number of repeats | Ratio  |
|-----------------|-----------------|-------------------|--------|
| mononucleotide  | A               | 20                | 62.2%  |
|                 | G               | 1                 |        |
|                 | T               | 25                |        |
| dinucleotide    | AG              | 1                 | 21.62% |
|                 | AT              | 3                 |        |
|                 | CT              | 1                 |        |
|                 | TA              | 10                |        |
|                 | TC              | 1                 |        |
| trinucleotide   | AAT             | 1                 | 4.05%  |
|                 | GAT             | 1                 |        |
|                 | TAT             | 1                 |        |
| tetranucleotide | AAAT            | 1                 | 12.16% |
|                 | AAGT            | 1                 |        |
|                 | AATA            | 1                 |        |
|                 | ATTT            | 1                 |        |
|                 | CAAA            | 1                 |        |
|                 | CCCA            | 1                 |        |
| TAAA            | 3               |                   |        |
