# Supplementary material for: The complete chloroplast genome sequence of Gynostemma yixingense and comparative analysis with congeneric species
Source: PubMed Central journal article supplement (PMC7521087; doi:10.1590/1678-4685-gmb-2020-0092), 2020-09-25
Supplement: 1415-4757-GMB-43-4-e20200092-suppl3.pdf [file 1415-4757-GMB-43-4-e20200092-suppl3.pdf]

**Supplementary Material to “The complete chloroplast genome sequence of *Gynostemma yixingense* and comparative analysis with congeneric species”.**

**Table S3-** Chloroplast genome sequences used for phylogenetic tree construction

| Species name                 | GenBank ID | Species name                             | GenBank ID |
|------------------------------|------------|------------------------------------------|------------|
| <i>Gynostemma yixingense</i> | MT028489   | <i>G. cardiospermum</i>                  | KX852299   |
| <i>G. longipes</i>           | MF152730   | <i>G. caulopterum</i>                    | MF136487   |
| <i>G. burmanicum</i>         | MF152731   | <i>G. compressum</i>                     | KY817143   |
| <i>G. laxiflorum</i>         | MF136486   |                                          |            |
| <i>G. pentagynum</i>         | KY670737   | Outgroups <i>Trichosanthes kirilowii</i> | MK036046   |
| <i>G. pentaphyllum</i>       | KX852298   | <i>Siraitia grosvenorii</i>              | MK818498   |
| <i>G. pubescens</i>          | MF152732   | <i>Hemsleya lijiangensis</i>             | MG733988   |
