# Supplementary material for: The complete chloroplast genome sequence of Gynostemma yixingense and comparative analysis with congeneric species
Source: PubMed Central journal article supplement (PMC7521087; doi:10.1590/1678-4685-gmb-2020-0092), 2020-09-25
Supplement: 1415-4757-GMB-43-4-e20200092-suppl4.pdf [file 1415-4757-GMB-43-4-e20200092-suppl4.pdf]

## Supplementary Material to “The complete chloroplast genome sequence of *Gynostemma yixingense* and comparative analysis with congeneric species”.

**Table S4** - List of 77 chloroplast protein coding genes used of in the phylogenetic analysis.

| Gene | Name                                           | Gene  | Name                                                             |
|------|------------------------------------------------|-------|------------------------------------------------------------------|
| accD | acetyl-CoA carboxylase beta subunit            | psbH  | photosystem II phosphoprotein                                    |
| atpA | ATP synthase CF1 alpha chain                   | psbI  | photosystem II protein I                                         |
| atpB | ATP synthase CF1 beta subunit                  | psbJ  | photosystem II protein J                                         |
| atpE | ATP synthase CF1 epsilon subunit               | psbK  | photosystem II protein K                                         |
| atpF | ATP synthase CF0 B subunit                     | psbL  | photosystem II protein L                                         |
| atpH | ATP synthase CF0 C chain                       | psbM  | photosystem II protein M                                         |
| atpI | ATP synthase CF0 A chain                       | psbN  | photosystem II protein N                                         |
| ccsA | cytochrome c biogenesis protein                | psbT  | photosystem II protein T                                         |
| cemA | envelope membrane protein                      | psbZ  | photosystem II protein Z                                         |
| clpP | ATP-dependent Clp protease proteolytic subunit | rbcL  | ribulose-1,5-bisphosphate<br>carboxylase/oxygenase large subunit |
| matK | maturase K                                     | rpl2  | ribosomal protein L2                                             |
| ndhA | NADH dehydrogenase subunit A                   | rpl14 | ribosomal protein L14                                            |
| ndhB | NADH dehydrogenase subunit B                   | rpl16 | ribosomal protein L16                                            |
| ndhC | NADH dehydrogenase subunit C                   | rpl20 | ribosomal protein L20                                            |
| ndhD | NADH dehydrogenase subunit D                   | rpl22 | ribosomal protein L22                                            |
| ndhE | NADH dehydrogenase subunit E                   | rpl23 | ribosomal protein L23                                            |
| ndhF | NADH dehydrogenase subunit F                   | rpl32 | ribosomal protein L32                                            |
| ndhG | NADH dehydrogenase subunit G                   | rpl33 | ribosomal protein L33                                            |
| nhdH | NADH dehydrogenase subunit H                   | rpl36 | ribosomal protein L36                                            |
| ndhI | NADH dehydrogenase subunit I                   | rpoA  | RNA polymerase alpha subunit                                     |
| ndhJ | NADH dehydrogenase subunit J                   | rpoB  | RNA polymerase beta subunit                                      |
| ndhK | NADH dehydrogenase subunit K                   | rpoC1 | RNA polymerase beta subunit-1                                    |
| petA | component of cytochrome b6/f complex           | rpoC2 | RNA polymerase beta subunit-2                                    |
| petB | cytochrome b6                                  | rps2  | ribosomal protein S2                                             |
| petD | cytochrome b6/f complex subunit IV             | rps3  | ribosomal protein S3                                             |
| petG | cytochrome b6/f complex subunit V              | rps4  | ribosomal protein S4                                             |
| petL | cytochrome b/f complex 3.5 kDa subunit         | rps7  | ribosomal protein S7                                             |
| petN | cytochrome b6/f complex subunit VIII           | rps8  | ribosomal protein S8                                             |
| psaA | photosystem I P700 apoprotein A1               | rps11 | ribosomal protein S11                                            |
| psaB | photosystem I P700 apoprotein A2               | rps12 | ribosomal protein S12                                            |
| psaC | photosystem I subunit VII                      | rps14 | ribosomal protein S14                                            |

| <b>Gene</b> | <b>Name</b>                                 | <b>Gene</b> | <b>Name</b>                         |
|-------------|---------------------------------------------|-------------|-------------------------------------|
| psaI        | photosystem I subunit VIII                  | rps15       | ribosomal protein S15               |
| psaJ        | photosystem I subunit IX                    | rps16       | ribosomal protein S16               |
| psbA        | photosystem II protein D1                   | rps18       | ribosomal protein S18               |
| psbB        | PSII 47 kDa protein                         | rps19       | ribosomal protein S19               |
| psbC        | photosystem II 43 kDa protein               | ycf1        | photosystem I assembly protein Ycf1 |
| psbD        | photosystem II protein D2                   | ycf2        | hypothetical chloroplast RF2        |
| psbE        | photosystem II protein V                    | ycf3        | photosystem I assembly protein Ycf3 |
| psbF        | photosystem II cytochrome b559 beta subunit |             |                                     |
